# Supplementary material
Source: MDPI journal article supplement (https://www.mdpi.com/2073-4441/15/3/594)
Supplement: s1 [file s1]

# Threshold Recognition of Water Turbidity for Clogging Prevention during Groundwater Recharge Using Secondary Effluent from Wastewater Treatment Plant

Shiwei Li <sup>1</sup>, Siyue Wang <sup>2</sup>, Shubin Zou <sup>1</sup>, Yang Wang <sup>3</sup>, Wei Fan <sup>1,\*</sup> and Dan Xiao <sup>2,\*</sup>

**Table S1.** Threshold values of suspended solids concentration and turbidity for reclaimed water quality standards in different regions.

| Standards/requirements of re-claimed water                           | area          | Turbidity (NTU) | SS (mg/L) |
|----------------------------------------------------------------------|---------------|-----------------|-----------|
| Standards of reclaimed water quality (SL368-2006)                    | China         | 5.00            | n         |
| Water quality standard for groundwater recharge (GB/T19772-2005)     | China         | 5.00            | n         |
| Reclaimed water quality and treatment requirements for 2012          | Florida       | n               | 5.00      |
| Guidelines for water reuse (US EPA/600/R-12/618)                     | Massachusetts | 2.00            | 5.00      |
| (Nonpotable aquifer recharge)                                        | Washington    | 2.00~5.00       | 5.00      |
| (Potable aquifer recharge)                                           | Washington    | 0.1~0.5         | 5.00      |
| Australian guidelines for water recycling (managed aquifer recharge) | Australia     | 1.00            | 10.0      |
| Standards for drinking water quality (GB 5749– 2006)                 | China         | 1.00            | n         |
| Drinking water guideline [1]                                         | Spanish       | 1.00            | n         |
| Water quality standard for groundwater recharge [2]                  | Japan         | n               | 2.00      |

## References

1. Camprovin, P.; Hernandez, M.; Fernandez, S.; Martin-Alonso, J.; Galofre, B.; Mesa, J. Evaluation of Clogging during Sand-Filtered Surface Water Injection for Aquifer Storage and Recovery (ASR): Pilot Experiment in the Llobregat Delta (Barcelona, Spain). *Water* **2017**, *9*, doi:10.3390/w9040263.
2. Okubo, T.; Matsumoto, J. Biological clogging of sand and changes of organic-constituents during artificail recharge. *Water Research* **1983**, *17*, 813-821, doi:10.1016/0043-1354(83)90077-5.

**Table S2.** The main water quality parameters of secondary wastewater.

| Parameter                     | Values            | Parameter                        | Values            |
|-------------------------------|-------------------|----------------------------------|-------------------|
| SS                            | $16.5 \pm 0.440$  | Total organic carbon             | $7.69 \pm 0.030$  |
| NTU                           | $1.88 \pm 0.050$  | Chemical oxygen demand           | $14.6 \pm 1.15$   |
| pH                            | $7.53 \pm 0.060$  | Biological oxygen demand         | $0.600 \pm 0.010$ |
| K <sup>+</sup>                | $14.8 \pm 0.030$  | Total nitrogen                   | $5.12 \pm 0.440$  |
| Na <sup>+</sup>               | $70.5 \pm 0.010$  | Total phosphorus                 | $0.050 \pm 0.000$ |
| NH <sub>4</sub> <sup>+</sup>  | $0.400 \pm 0.010$ | Total bacterial count (cells/mL) | 0.000             |
| Ca <sup>2+</sup>              | $109 \pm 0.370$   | Polysaccharide                   | $1.10 \pm 0.260$  |
| Mg <sup>2+</sup>              | $10.4 \pm 0.040$  | Protein                          | $13.5 \pm 0.630$  |
| Al <sup>3+</sup>              | $0.210 \pm 0.070$ | Zeta potential (mv)              | $-20.2 \pm 0.500$ |
| NO <sub>3</sub> <sup>-</sup>  | $10.6 \pm 0.010$  | Conductivity (mS/cm)             | $0.890 \pm 0.000$ |
| NO <sub>2</sub> <sup>-</sup>  | $0.050 \pm 0.000$ | Salinity                         | $0.480 \pm 0.000$ |
| Cl <sup>-</sup>               | $96.3 \pm 0.160$  | UV <sub>254</sub>                | $0.110 \pm 0.000$ |
| HCO <sub>3</sub> <sup>-</sup> | $184 \pm 0.210$   | Residual chlorine                | > 0.500           |
| Fe <sup>2+</sup>              | $0.180 \pm 0.030$ |                                  |                   |

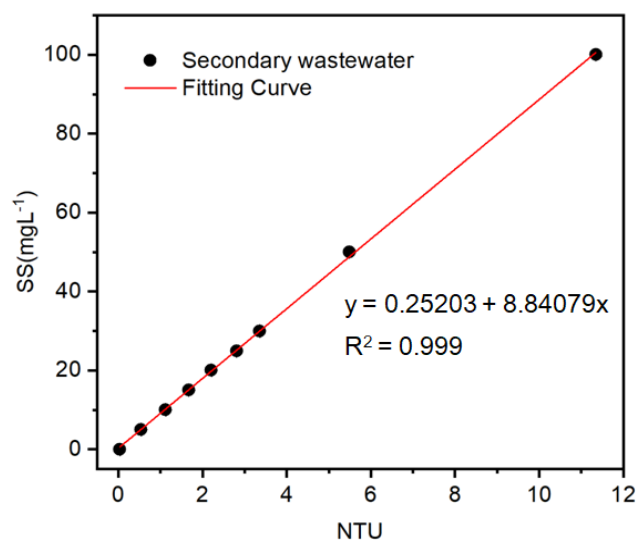**Figure S1.** Linear calibration curves of NTU and SS for suspended particles.

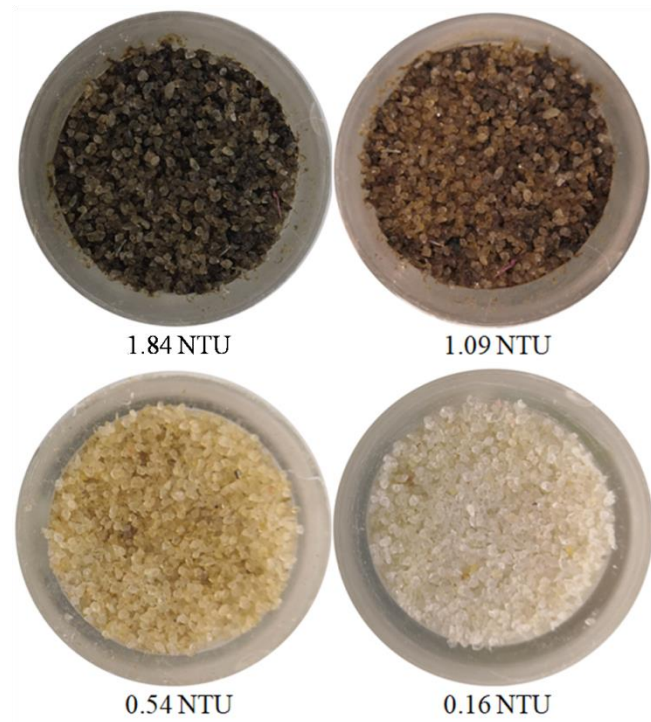

**Figure S2.** The pictures of the surface of porous medium at the end of the experiments.

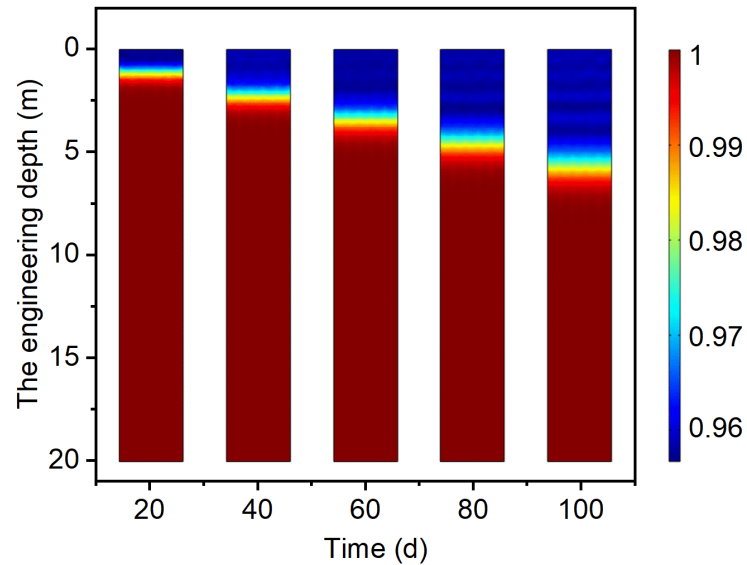

**Figure S3.** Clogging of infiltration safety threshold recharge water at large-scale site.

**Text S1. Formulae for calculating  $\Phi_{VDW}$  and  $\Phi_{EDL}$ .**

The ordinate of the DLVO potential energy diagram corresponds to the interaction energy between the suspended and collected particles, while the abscissa represents the separation distance between them. The  $\Phi_{VDW}$  is calculated from the following equation:

$$\Phi_{VDW} = -\frac{Ar}{6(1+14h/\lambda)} \quad (1)$$

where  $A$  is the Hamaker constant for organic ( $6.50 \times 10^{-21}$  J) and inorganic particles ( $1.00 \times 10^{-20}$  J) [3],  $r$  is the radius of suspended particles,  $h$  is the separation distance between the surfaces of suspended particles and quartz sands, and  $\lambda$  is the characteristic wavelength of suspended particles ( $\lambda = 100$  nm) [4].

The  $\Phi_{EDL}$  can be calculated as:

$$\Phi_{dl} = \pi \varepsilon_0 \varepsilon_r \left\{ 2\psi_1 \psi_2 \ln \left[ \frac{1 + \exp(-\kappa y)}{1 - \exp(-\kappa y)} \right] + (\psi_1^2 + \psi_2^2) \ln[1 - \exp(-2\kappa y)] \right\} \quad (2)$$

where  $\varepsilon_0$  is the vacuum permittivity ( $8.85 \times 10^{-12} \text{ C J}^{-1} \text{ m}^{-1}$ ),  $\varepsilon_r$  is the relative dielectric permittivity of water (82.1),  $\varphi_1$  and  $\varphi_2$  are the surface potentials of suspended particles and quartz sands, respectively, and  $\kappa$  is the Debye reciprocal length.

## References

3. Redman, J.A.; Walker, S.L.; Elimelech, M. Bacterial adhesion and transport in porous media: Role of the secondary energy minimum. *Environmental Science & Technology* 2004, 38, 1777-1785, doi:10.1021/es034887l.
4. Fan, W.; Jiang, X.H.; Yang, W.; Geng, Z.; Huo, M.X.; Liu, Z.M.; Zhou, H. Transport of graphene oxide in saturated porous media: Effect of cation composition in mixed Na-Ca electrolyte systems. *Science of the Total Environment* 2015, 511, 509-515, doi:10.1016/j.scitotenv.2014.12.099.
